# Supplementary material for: A Preliminary Study of Viral Metagenomics of French Bat Species in Contact with Humans: Identification of New Mammalian Viruses
Source: PubMed Central journal article supplement (PMC3906132; doi:10.1371/journal.pone.0087194), 2014-01-29
Supplement: pone.0087194.s005.pdf [file pone.0087194.s005.pdf]

**Table S1 : Identification and distribution of sequences of insect and plant viruses of interest among the various bat specimens and tissue samples analyzed**

|               |                                 | Bat species, specimens and tissue samples <sup>a</sup> |    |    |                                       |    |    |                          |    |    |                 |                      |    |                 |                         |                 |    |                            |                                  |    |                          |                 |    |    |                 |    |
|---------------|---------------------------------|--------------------------------------------------------|----|----|---------------------------------------|----|----|--------------------------|----|----|-----------------|----------------------|----|-----------------|-------------------------|-----------------|----|----------------------------|----------------------------------|----|--------------------------|-----------------|----|----|-----------------|----|
| Virus         | Sequence detection <sup>b</sup> | <i>Pipistrellus pipistrellus</i>                       |    |    |                                       |    |    |                          |    |    |                 | <i>Hypsugo savii</i> |    |                 | <i>Myotis nattereri</i> |                 |    | <i>Eptesicus serotinus</i> |                                  |    | <i>Myotis mystacinus</i> |                 |    |    |                 |    |
|               |                                 | b1                                                     |    |    | b2                                    |    |    | b3                       |    |    | b4              |                      |    | b9              |                         | b5              |    |                            | b6                               |    |                          | b7              |    |    | b8              |    |
|               |                                 | Br                                                     | Li | Lu | Br                                    | Li | Lu | Br                       | Li | Lu | Br              | Li                   | Lu | Li              | Lu                      | Br              | Li | Lu                         | Br                               | Li | Lu                       | Br              | Li | Lu | Li              | Lu |
| Dicistrovirus | HTS                             | - <sup>c</sup> (tissue pool)                           |    |    | + <sup>c</sup> (tissue pool) [ORF1-2] |    |    | - (tissue pool)          |    |    | - (tissue pool) |                      |    | - (tissue pool) |                         | - (tissue pool) |    |                            | - (tissue pool)                  |    |                          | - (tissue pool) |    |    | - (tissue pool) |    |
|               | PCR/Sanger                      | -                                                      | -  | -  | -                                     | -  | +  | [ORF1]                   | -  | -  | -               | -                    | -  | -               | -                       | -               | -  | -                          | -                                | -  | -                        | -               | -  | -  | -               | -  |
| Nodavirus     | HTS                             | - (tissue pool)                                        |    |    | - (tissue pool)                       |    |    | - (tissue pool)          |    |    | - (tissue pool) |                      |    | - (tissue pool) |                         | - (tissue pool) |    |                            | + (tissue pool) [multiple genes] |    |                          | - (tissue pool) |    |    | -               |    |
|               | PCR/Sanger                      | -                                                      | -  | -  | -                                     | -  | -  | -                        | -  | -  | -               | -                    | -  | -               | -                       | -               | -  | -                          | -                                | -  | -                        | -               | -  | -  | -               | -  |
| Luteovirus    | HTS                             | - (tissue pool)                                        |    |    | - (tissue pool)                       |    |    | + (tissue pool) [ORF1-2] |    |    | - (tissue pool) |                      |    | - (tissue pool) |                         | - (tissue pool) |    |                            | - (tissue pool)                  |    |                          | - (tissue pool) |    |    | -               |    |
|               | PCR/Sanger                      | ND <sup>d</sup>                                        | ND | ND | ND                                    | ND | ND | ND                       | ND | ND | ND              | ND                   | ND | ND              | ND                      | ND              | ND | ND                         | ND                               | ND | ND                       | ND              | ND | ND | ND              | ND |
| Sobemovirus   | HTS                             | - (tissue pool)                                        |    |    | - (tissue pool)                       |    |    | + (tissue pool) [ORF4]   |    |    | - (tissue pool) |                      |    | - (tissue pool) |                         | - (tissue pool) |    |                            | - (tissue pool)                  |    |                          | - (tissue pool) |    |    | -               |    |
|               | PCR/Sanger                      | ND                                                     | ND | ND | ND                                    | ND | ND | ND                       | ND | ND | ND              | ND                   | ND | ND              | ND                      | ND              | ND | ND                         | ND                               | ND | ND                       | ND              | ND | ND | ND              | ND |

**Legend :**

<sup>a</sup> : Br = brain, Li = liver, Lu = lungs

<sup>b</sup> : Matching (HTS) or targeting (PCR/Sanger) viral genes (in brackets), with ORF = open reading frame

<sup>c</sup> : + = positive, - = negative

<sup>d</sup> : ND = not done
