# Supplementary material for: A Preliminary Study of Viral Metagenomics of French Bat Species in Contact with Humans: Identification of New Mammalian Viruses
Source: PLOS journal article supplement (doi:10.1371/journal.pone.0087194), 2014-01-29
Supplement: S3 (10.1371/journal.pone.0087194.s003) [file journal.pone.0087194.s003]

**Figure S3**

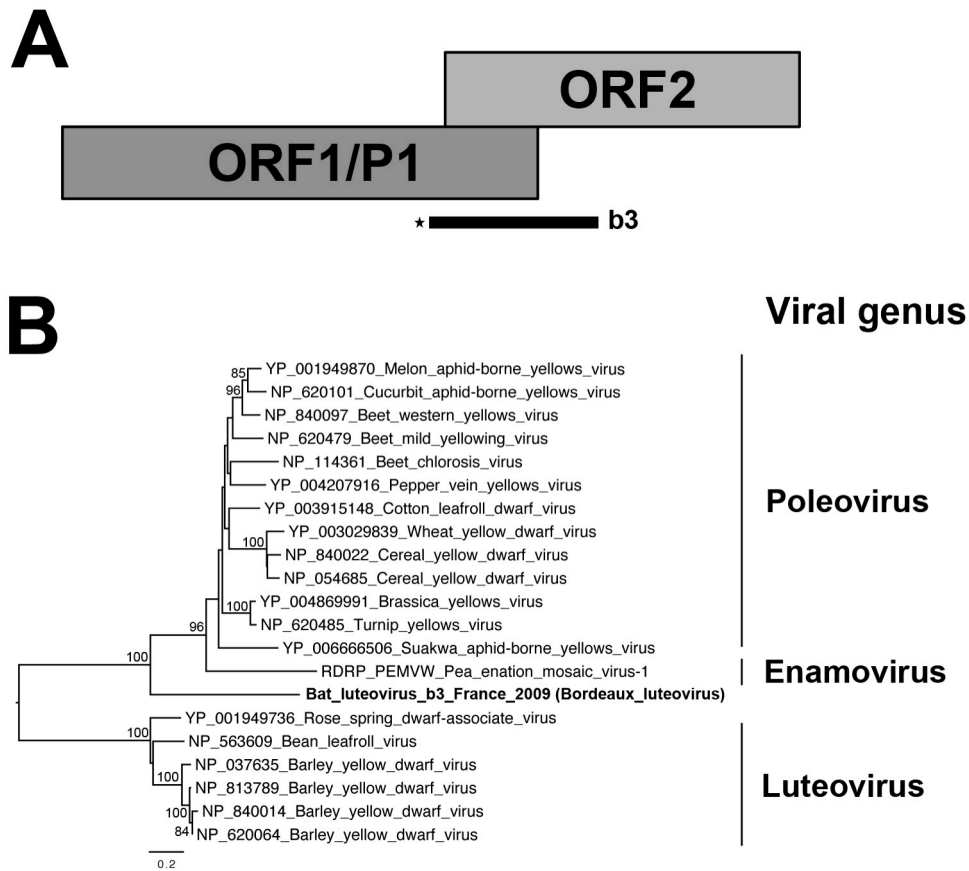

Phylogenetic analysis of the bat luteovirus-related sequence. (A) Schematic representation of the ORF1-2 genome region (almost 3,150 nt) encoding the RNA-dependent RNA polymerase as a P1-P2 fusion protein (almost 1050 aa) from the pea enation mosaic virus-1 (Uniprot number P29154), with the black bar corresponding to the longest HSP sequence (>700 nt) from bat luteovirus (named Bordeaux luteovirus) identified in samples from b3 (*Pipistrellus pipistrellus*). (B) Phylogenetic tree produced from the amino-acid alignment based on the partial ORF1-2 sequence (203 aa, approximate aa positions 698 to 907 of the pea enation mosaic virus-1 protein P1-P2) translated from the longest HSP. The bat luteovirus-related sequence is indicated in bold, within the various viral genera. The scale bar indicates branch length, and bootstrap values  $\geq 70\%$  are shown next to the relevant nodes. The tree is midpoint-rooted for purposes of clarity only.
